# Supplementary material
Source: publisher figshare collection journal article supplement (https://gsapubs.figshare.com/ndownloader/files/23317136)
Supplement: Supplementary file 1 [file 23317136]

1 GSA Data Repository 2019332

2

3 **Harel et al., 2019, Drainage reversal toward cliffs induced by lateral lithologic**  
4 **differences**

5 **SUPPLEMENTARY TABLE, FIELD AREA DESCRIPTION, METHODS AND**  
6 **FIGURES**

7 (1) Table DR1. List of channels that transect the Southwestern Arava escarpment

8 (2) Field area DR1.

9 (3) Methods DR1. Calculating the  $\chi$  map, DEMs production using drone acquired aerial  
10 photos, defining the northing trend, measuring the apparent thickness of the erodible  
11 valley fill layer, automatic calculation of tributary junction angle.

12 (4) Figure DR1.

13 (5) Figure DR2.

14 (6) Figure DR3.

15 (7) Figure DR4.

16 (8) Figure DR5.

17 (9) Figure DR6.

18 (10) Figure DR7.

19 (11) Figure DR8.

20 (12) Figure DR9.

21 (13) References.

22 (1) TABLE DR1. LIST OF CHANNELS THAT TRANSECT THE SOUTHWESTERN  
 23 ARAVA ESCARPMENT\*

| Index             | Basin/<br>Windgap* | Intersection<br>with<br>escarpment<br>cliff:<br>Lat.,lon. | Reversed<br>length**<br>[m] ( $\pm 20$ ) | Embayment<br>length#[m]<br>( $\pm 20$ ) | Windgap<br>to<br>waterfall<br>Height<br>difference<br>[m] ( $\pm 2$ ) | Height of<br>rock<br>outcrop<br>upstream<br>from<br>waterfall<br>[m] ( $\pm 2$ ) | Apparent<br>thickness<br>of<br>erodible<br>fill## ( $\pm 2$ )<br>[m] | barbed<br>tributaries<br>angle###   |
|-------------------|--------------------|-----------------------------------------------------------|------------------------------------------|-----------------------------------------|-----------------------------------------------------------------------|----------------------------------------------------------------------------------|----------------------------------------------------------------------|-------------------------------------|
| 1 <sup>†</sup>    | Ktura              | 35.06314/<br>30.03613                                     | 4668                                     | 1149                                    | 32                                                                    | 5                                                                                | 27                                                                   | 152,<br>135,<br>143,<br>108,<br>105 |
| 2                 | Ktura              | 35.05994/<br>30.02146                                     | 234                                      | 386                                     | 14                                                                    | -                                                                                | 14                                                                   | -                                   |
| 3 <sup>†</sup>    | Grofit             | 35.04618/<br>30.01145                                     | 1827                                     | 1207                                    | 37                                                                    | 7                                                                                | 30                                                                   | 99,<br>99,<br>128,<br>150,<br>102   |
| 4                 | Grofit             | 35.05071/<br>30.0049                                      | 172                                      | 534                                     | 12                                                                    | -                                                                                | 12                                                                   | -                                   |
| 5                 | Grofit             | 35.04444/<br>29.99491                                     | 385                                      | -                                       | 42                                                                    | 29                                                                               | 13                                                                   | -                                   |
| 6 <sup>†</sup>    | Grofit             | 35.04107/<br>29.99121                                     | 690                                      | 246                                     | 25                                                                    | 6                                                                                | 19                                                                   | 136                                 |
| 7 <sup>†</sup>    | Aya-<br>Grofit     | 35.03804/<br>29.98715                                     | -                                        | -                                       | -                                                                     | -                                                                                | -                                                                    | -                                   |
| 8 <sup>†</sup>    | Grofit             | 35.03658/<br>29.98446                                     | 271                                      | 30                                      | 11                                                                    | 6                                                                                | 5                                                                    | 136                                 |
| 9 <sup>†</sup>    | Kasuy-<br>Grofit   | 35.03461/<br>29.98076                                     | -                                        | -                                       | -                                                                     | -                                                                                | -                                                                    | -                                   |
| 10 <sup>†,*</sup> | Itro east          | 35.03388/<br>29.97235                                     | 443                                      | 118                                     | 29                                                                    | 6                                                                                | 23                                                                   | 110                                 |
| 11                | Itro-<br>Itro east | 35.03228/<br>29.96649                                     | -                                        | -                                       | -                                                                     | -                                                                                | -                                                                    | -                                   |
| 12                | Itro-<br>Itro east | 35.03229/<br>29.96442                                     | -                                        | -                                       | -                                                                     | -                                                                                | -                                                                    | -                                   |
| 13 <sup>†</sup>   | Itro-<br>Itro east | 35.02985/<br>29.96066                                     | -                                        | -                                       | -                                                                     | -                                                                                | -                                                                    | -                                   |
| 14                | Itro-<br>Itro east | 35.02917/<br>29.9584                                      | -                                        | -                                       | -                                                                     | -                                                                                | -                                                                    | -                                   |

| Index            | Basin/<br>Windgap*            | Intersection<br>with<br>escarpment<br>cliff:<br>Lat.,lon. | Reversed<br>length**<br>[m] ( $\pm 20$ ) | Embayment<br>length#[m]<br>( $\pm 20$ ) | Windgap<br>to<br>waterfall<br>Height<br>difference<br>[m] ( $\pm 2$ ) | Height of<br>rock<br>outcrop<br>upstream<br>from<br>waterfall<br>[m] ( $\pm 2$ ) | Apparent<br>thickness<br>of<br>erodible<br>fill### ( $\pm 2$ )<br>[m] | barbed<br>tributaries<br>angles### |
|------------------|-------------------------------|-----------------------------------------------------------|------------------------------------------|-----------------------------------------|-----------------------------------------------------------------------|----------------------------------------------------------------------------------|-----------------------------------------------------------------------|------------------------------------|
| 15               | Itro-<br>Itro east            | 35.02891/<br>29.95535                                     | -                                        | -                                       | -                                                                     | -                                                                                | -                                                                     | -                                  |
| 16               | Itro-<br>Itro east            | 35.02822/<br>29.95353                                     | -                                        | -                                       | -                                                                     | -                                                                                | -                                                                     | -                                  |
| 17               | Reuel<br>east                 | 35.02768/<br>29.95075                                     | 98                                       | 84                                      | 8                                                                     | -                                                                                | 8                                                                     | -                                  |
| 18               | Reuel<br>east                 | 35.02604/<br>29.94773                                     | 123                                      | -                                       | 11                                                                    | -                                                                                | 11                                                                    | -                                  |
| 19 <sup>†</sup>  | Itro-<br>Reuel<br>east        | 35.02308/<br>29.94368                                     | -                                        | -                                       | -                                                                     | -                                                                                | -                                                                     | -                                  |
| 20 <sup>†</sup>  | Itro-<br>Reuel<br>east        | 35.02207/<br>29.94307                                     | -                                        | -                                       | -                                                                     | -                                                                                | -                                                                     | -                                  |
| 21 <sup>†</sup>  | Itro-<br>Reuel<br>east        | 35.01993/<br>29.94087                                     | -                                        | -                                       | -                                                                     | -                                                                                | -                                                                     | -                                  |
| 22 <sup>†</sup>  | Reuel<br>east                 | 35.01758/<br>29.93996                                     | 79                                       | -                                       | 6                                                                     | 3                                                                                | 3                                                                     | -                                  |
| 23               | Reuel<br>east                 | 35.01455/<br>29.93656                                     | 23                                       | -                                       | 3                                                                     | -                                                                                | 3                                                                     | -                                  |
| 24               | Shaharut-<br>Reuel<br>east    | 35.0098/2<br>9.92917                                      | -                                        | -                                       | -                                                                     | -                                                                                | -                                                                     | -                                  |
| 25 <sup>†*</sup> | Shaharut<br>east              | 35.00787/<br>29.91923                                     | 185                                      | -                                       | 13                                                                    | 1                                                                                | 12                                                                    | -                                  |
| 26               | Shaharut-<br>Shaharut<br>east | 35.00657/<br>29.91491                                     | -                                        | -                                       | -                                                                     | -                                                                                | -                                                                     | -                                  |
| 27               | Shaharut-<br>Shaharut<br>east | 35.00574/<br>29.91274                                     | -                                        | -                                       | -                                                                     | -                                                                                | -                                                                     | -                                  |
| 28               | Shaharut-<br>Shaharut<br>east | 35.00559/<br>29.91139                                     | -                                        | -                                       | -                                                                     | -                                                                                | -                                                                     | -                                  |
| 29               | Shaharut<br>east              | 35.00477/<br>29.90434                                     | 17                                       | -                                       | 1                                                                     | -                                                                                | 1                                                                     | -                                  |
| 30 <sup>†</sup>  | Shaharut<br>east              | 34.99676/<br>29.90046                                     | 45                                       | -                                       | 5                                                                     | 3                                                                                | 2                                                                     | -                                  |

| Index           | Basin/<br>Windgap <sup>*</sup> | Intersection<br>with<br>escarpment<br>cliff:<br>Lat.,lon. | Reversed<br>length <sup>**</sup><br>[m] (±20) | Embayment<br>length <sup>#</sup> [m]<br>(±20) | Windgap<br>to<br>waterfall<br>Height<br>difference<br>[m] (±2) | Height of<br>rock<br>outcrop<br>upstream<br>from<br>waterfall<br>[m] (±2) | Apparent<br>thickness<br>of<br>erodible<br>fill <sup>##</sup> (±2)<br>[m] | barbed<br>tributaries<br>angles <sup>###</sup> |
|-----------------|--------------------------------|-----------------------------------------------------------|-----------------------------------------------|-----------------------------------------------|----------------------------------------------------------------|---------------------------------------------------------------------------|---------------------------------------------------------------------------|------------------------------------------------|
| 31 <sup>†</sup> | Shaharut<br>east               | 34.99412/<br>29.89555                                     | 114                                           | -                                             | 7                                                              | -                                                                         | 0 <sup>§</sup>                                                            | -                                              |
| 32 <sup>†</sup> | Yotvata                        | 34.99477/<br>29.88625                                     | 65                                            | -                                             | 7                                                              | -                                                                         | 7                                                                         | -                                              |
| 33              | Tze'ela-<br>Yotvata            | 34.98087/<br>29.87275                                     | -                                             | -                                             | -                                                              | -                                                                         | -                                                                         | -                                              |
| 34              | Tze'ela-<br>Yotvata            | 34.98024/<br>29.87202                                     | -                                             | -                                             | -                                                              | -                                                                         | -                                                                         | -                                              |
| 35              | Argaman                        | 34.9816/<br>29.84957                                      | 80                                            | -                                             | 5                                                              | -                                                                         | 5                                                                         | -                                              |
| 36 <sup>†</sup> | Kadkod                         | 34.97173/<br>29.84269                                     | 24                                            | 142                                           | 1                                                              | -                                                                         | 10 <sup>§§</sup>                                                          | -                                              |
| 37              | Uvda-<br>Sasgon                | 34.96381/<br>29.82544                                     | -                                             | -                                             | -                                                              | -                                                                         | -                                                                         | -                                              |
| 38              | Uvda-<br>Sasgon                | 34.96188/<br>29.82365                                     | -                                             | -                                             | -                                                              | -                                                                         | -                                                                         | -                                              |

24 Notes:

25 \*Our observations of the highland drainage network are based on morphometric analysis  
26 over a 12 m DEM acquired from TanDEM-X (Wessel, 2016).

27 <sup>\*</sup>The basin name refers to the transect between the channel and the escarpment. In  
28 reversed channels, the transect is a waterfall, and the name represents the east draining  
29 basin. When there is no reversal, the transect is a saddle, and its name represents the two  
30 basins that diverge from it.

31 <sup>\*\*</sup>Distance along flow from the windgap to the waterfall.

32 <sup>#</sup>Distance along flow from the waterfall to a line that represents the regional escarpment  
33 cliff.

34 <sup>##</sup> see methods DR1.

35 <sup>###</sup> see methods DR1.

36 † sites that were surveyed in the field.

37 ‡Measured from a drone created DEM. Reported errors are smaller than TanDEM-X  
38 data: the horizontal error is 0.1m and the vertical error is 0.06m.

39 § A field survey reveals that here, the reversed channel is not associated with incision into  
40 valley fill, but it was likely formed by a natural dam in the antecedent channel. More  
41 specifically, the windgap in this location is associated with coarse deposits at the outlet of  
42 a side tributary, these deposits are likely associated with debris flow deposits that  
43 dammed the channel and induced its reversal.

44 §§Nine meters of alluvial coating sitting on the waterfall.

45

46

47

48 (2) FIELD AREA DR1.

49 The Arava Valley is a rift like structure stretching between the Dead Sea and the  
50 Gulf of Aqaba, that is part of the transtensional Sinai-Arabia plate boundary. Several  
51 tectonic and structural features control the morphology of the Arava Valley: (1) A series  
52 of steep normal faults bound the Arava Valley from both the Jordanian heights in the east  
53 and the Israeli Negev in the west (Amit et al., 2002; Garfunkel et al., 2014). These faults  
54 contribute to its rift like morphology, with a 5-10 km wide valley bounded by high  
55 eastern shoulders and segmented lower western shoulders. (2) A segmented strike-slip  
56 system that induces the sinistral offset between the plates (Ginat et al., 1998; Garfunkel et  
57 al., 2014; Beyth et al., 2018). (3) Further to the west, extending sub-parallel to the Arava  
58 Valley, an asymmetrical wide anticline has been proposed to be reactivated in the Plio-  
59 Pleistocene (Wdowinski and Zilberman, 1996, 1997; Ginat et al., 2000) and to induce  
60 east or northeast tilt of the central and southeastern Negev toward the Arava Valley  
61 (Ginat et al., 2000).

62 In the current research, we focus on the escarpment segment that bounds the  
63 Southern Arava Valley from the west. Here, the escarpment is shoulder-type with a major  
64 water divide that mostly follows the escarpment cliff. To the east of the water divide,  
65 steep basins drain to the southern Arava, and to its west, low relief channels are incised  
66 into table-like interfluves and flow west to Biqu't Uvda, before joining the Hiyyon basin  
67 that drains to the central Arava Valley.

68 The current drainage configuration differs significantly from the drainage  
69 geometry of the previous geologic epochs (Avni et al., 2000). Prior to the formation of  
70 the Sinai-Arabia plate boundary, in the early Miocene (Garfunkel et al., 2014), large

71 rivers drained west from Arabia across the present day Arava Valley to the  
72 Mediterranean, over an extensive truncated surface that was formed in the Oligocene  
73 (Avni et al., 2012; Mart and Vachtman, 2015). In the Pliocene, segments of the central  
74 and southern Arava Valley have already formed, acting as local base levels. Nonetheless,  
75 other parts were less subdued, allowing a drainage regime whereby areas east to the  
76 Arava Valley were drained across the Sinai-Arabia plate boundary toward the central  
77 Negev. Finally, during the early quaternary, a major phase of drainage reorganization  
78 redirected large drainages of the southeastern Negev to the central Arava Valley by a  
79 series of capture events (Avni et al., 2000; Guralnik et al., 2010).

80       The climatic conditions are hyper-arid with precipitation rate  $\lesssim 50$  mm/yr. It was  
81 suggested that with the exception of relatively short-lived episodes of more humid  
82 conditions during the late Pliocene and Pleistocene (Beyth et al., 2018; Vaks et al., 2013),  
83 the current hyper-arid conditions have persisted since the late Pliocene (Vaks et al.,  
84 2013).

85

86

87

88

89

### (3) METHODS DR1.

#### Method 1: **Calculating the $\chi$ map**

Figure 3 in the main text depicts a  $\chi$  map of the study area and of the basins that drain the escarpment to the east.  $\chi$  was calculated over the drainage network defined by using a threshold drainage area of 50 pixels (pixel dimensions are 30x30 m).  $\chi$  was defined using the equation (Willett et al., 2014):

$$\chi(x) = \int_{x_b}^x \left( \frac{A_0}{A(x')} \right)^\theta dx'$$

with  $A_0 = 1 \text{ m}^2$ ,  $\theta = 0.3$ , which was found to linearize the main trunk and tributaries (Perron and Royden, 2012) of the largest basin, and  $x_b$  is set to be at elevations of 135 m.

#### Method 2: **Producing DEMs using drone acquired aerial photos and determining terrace extension**

We generated high resolution DEMs and orthophotos for channels 10 and 25 in table DR1 from aerial photos acquired by a DJI Phantom III drone with ~80% overlap between the photos. The DEMs and the orthophotos were produced using the Agisoft 'Photoscan' commercial code that applies a SfM algorithm. Differential GPS was used to accurately locate 20 anchoring points in each site. The longitudinal profiles of the active channels and the terraces (Fig. 3E and 3F) were extracted from the DEMs and validated against field mapping.

The horizontal extent of the terraces shown in Fig. DR8 was determined by a four steps procedure using ArcGIS: First, a slope raster was generated and a threshold slope ( $2^\circ$  in fig. A,  $7^\circ$  in Fig B) was used to define pixels of low slope. Second, regions with high density of low-slope pixels were identified by dividing the region to coarser pixels (1 and



1.4m for fig. A and B respectively) and searching for the number of low-slope fine pixels within a 1m radius circle that was centered in each coarse pixel. Coarse pixels with low density of low slope fine pixels ( $<3.8\%$  and  $<5.5\%$ , in fig. A and B respectively) were eliminated. Third, the circumferences of areas with high density of coarse pixels that are not part of the channels were defined as terraces and mapped as polygons. Finally, the terrace polygons were validated against field mapping of terraces and final editing was performed.

In the upper Shahrut east basin, channel 25 in table DR1 (Fig. DR8A), the areas that were disturbed by a dirt road were eliminated from the terrace polygons. In the same site, the channel might also be disturbed by the dirt road, but the water divide and the waterfall locations and elevations are likely unaffected, so the road does not have a significant effect on the channel profile.

### Method 3: **Defining the northing trend**

Figure 4B shows the length of the reversed channels as a function of a northing trend. Northing was defined based on the Euclidian distance to the southmost windgap, No. 38 in table DR1. Each channel is represented by its transect point with the cliff, which is either a waterfall or a saddle.

### Method 4: **Measuring the apparent thickness of the erodible valley fill layer**

Column 8 in table DR1 reports the apparent thickness of the erodible fill unit into which the reversed channel incises. The apparent thickness was defined as the elevation difference between the windgap (which is consistently located on top of the erodible fill)

and the closest contact between the erodible fill and the underlying bedrock (Fig. DR7), which was typically at or slightly upstream from the lip of the waterfall. Bedrock exposure location was identified in the field, and by using field photos and orthophotos. Where we identified valley fill on the waterfall (no. 36 in table DR1), we added its thickness to the estimation of the apparent thickness. The true fill thickness (as opposed to the apparent thickness) is expected to be larger due to the westward grading of the antecedent channels. The estimation of the true thickness requires knowledge of the antecedent slope, which is rarely preserved.

#### Method 5: **Automatic calculation of tributary junction angle**

Column 9 in table DR1. reports the tributary junction angle for barbed tributaries. The junction angle was calculated automatically using a Matlab script. Upon manual selection of a tributary channel head and the tributary junction points, the script calculates the orientation of two lines. The lines are defined based on orthogonal linear regressions through the pixels of the drainage network. The first line uses the drainage network pixels between the two chosen points. The second line uses the pixels between the junction point and a point that is located upstream from it, at a distance which is half of the along flow length of the tributary. The junction angle is defined as the difference between the orientations of the two lines.

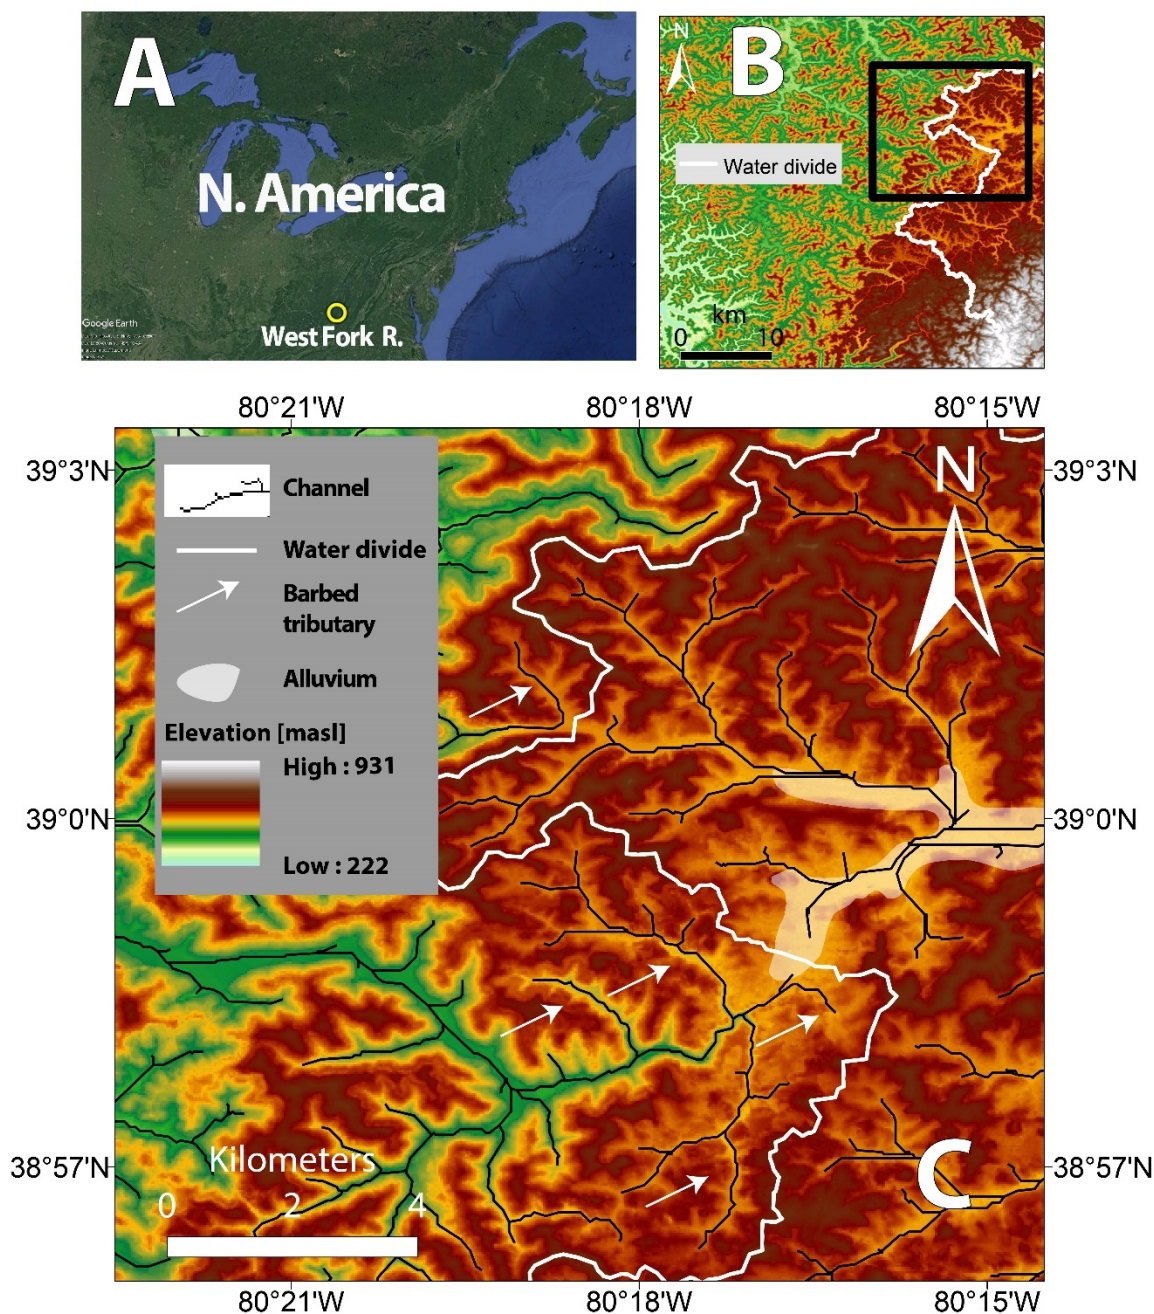

Figure DR1. Barbed drainages in Fall Run, a tributary of the West Fork river, West Virginia. A. General Location map. B. Zoom-in location map. West to the water divide, steep, west flowing channels incise the highlands. C. Reversed channels with barbed tributaries. Here, the headwater of a reversed channel is incised in a mapped alluvial unit (Cardwell et al., (1968)) that fills the antecedent, east flowing valley.

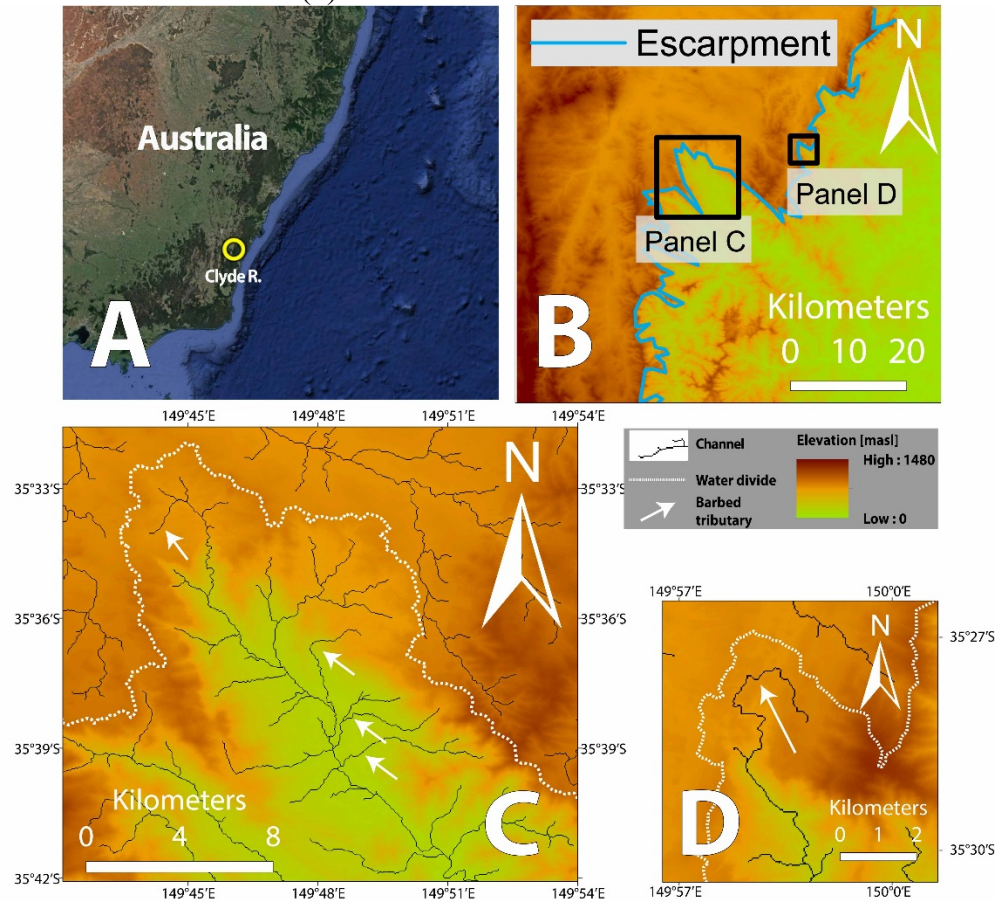

Figure DR2. Barbed drainage morphology in the headwaters of the Clyde river near the great escarpment of eastern Australia. The barbed drainage indicates drainage reversal in the Clyde river. This is a single example out of many along the great escarpment of eastern Australia (Ollier and Pain, 1997; Ollier, 1995; Seidl et al., 1996) A. General Location map. B. Zoom-in location map, depicting the shoulder-type escarpment (i.e. Matmon et al., 2002), and referring to panel C and D. Reversed channels with barbed tributaries in C and hook-shape headwaters in D. Note the embayment of the escarpment along the reversed channels.



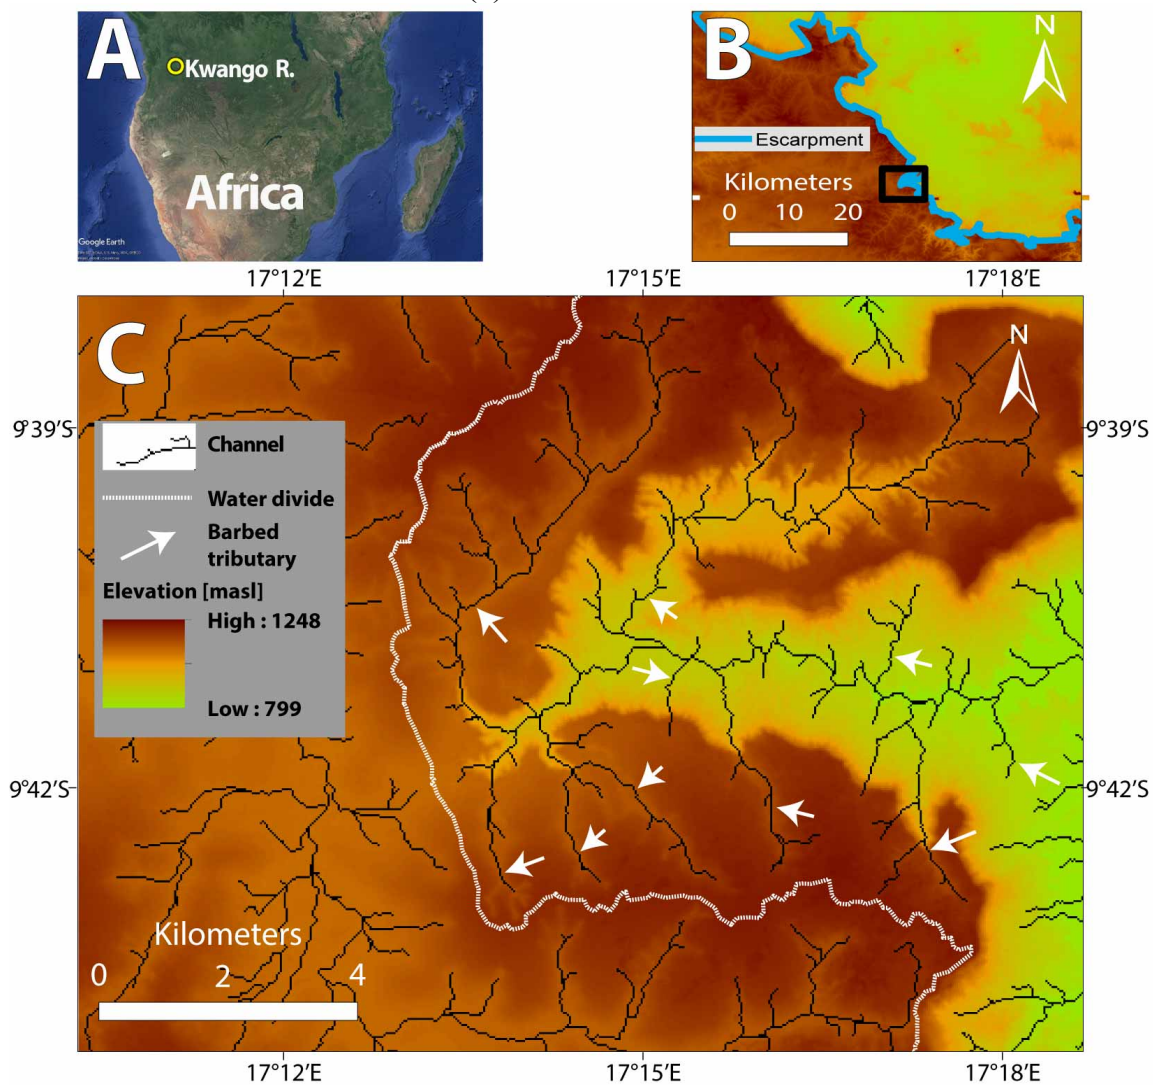

Figure DR3. Barbed drainage morphology in the headwaters of the Kwango river, Angola, near a shoulder-type escarpment. A. General Location map. B. Zoom-in location map, depicting the escarpment. C. A large basin with barbed tributaries that flow from the highland across the escarpment. Note the extreme embayment of the escarpment, which probably occurs through knickpoint migration along the reversed channel.

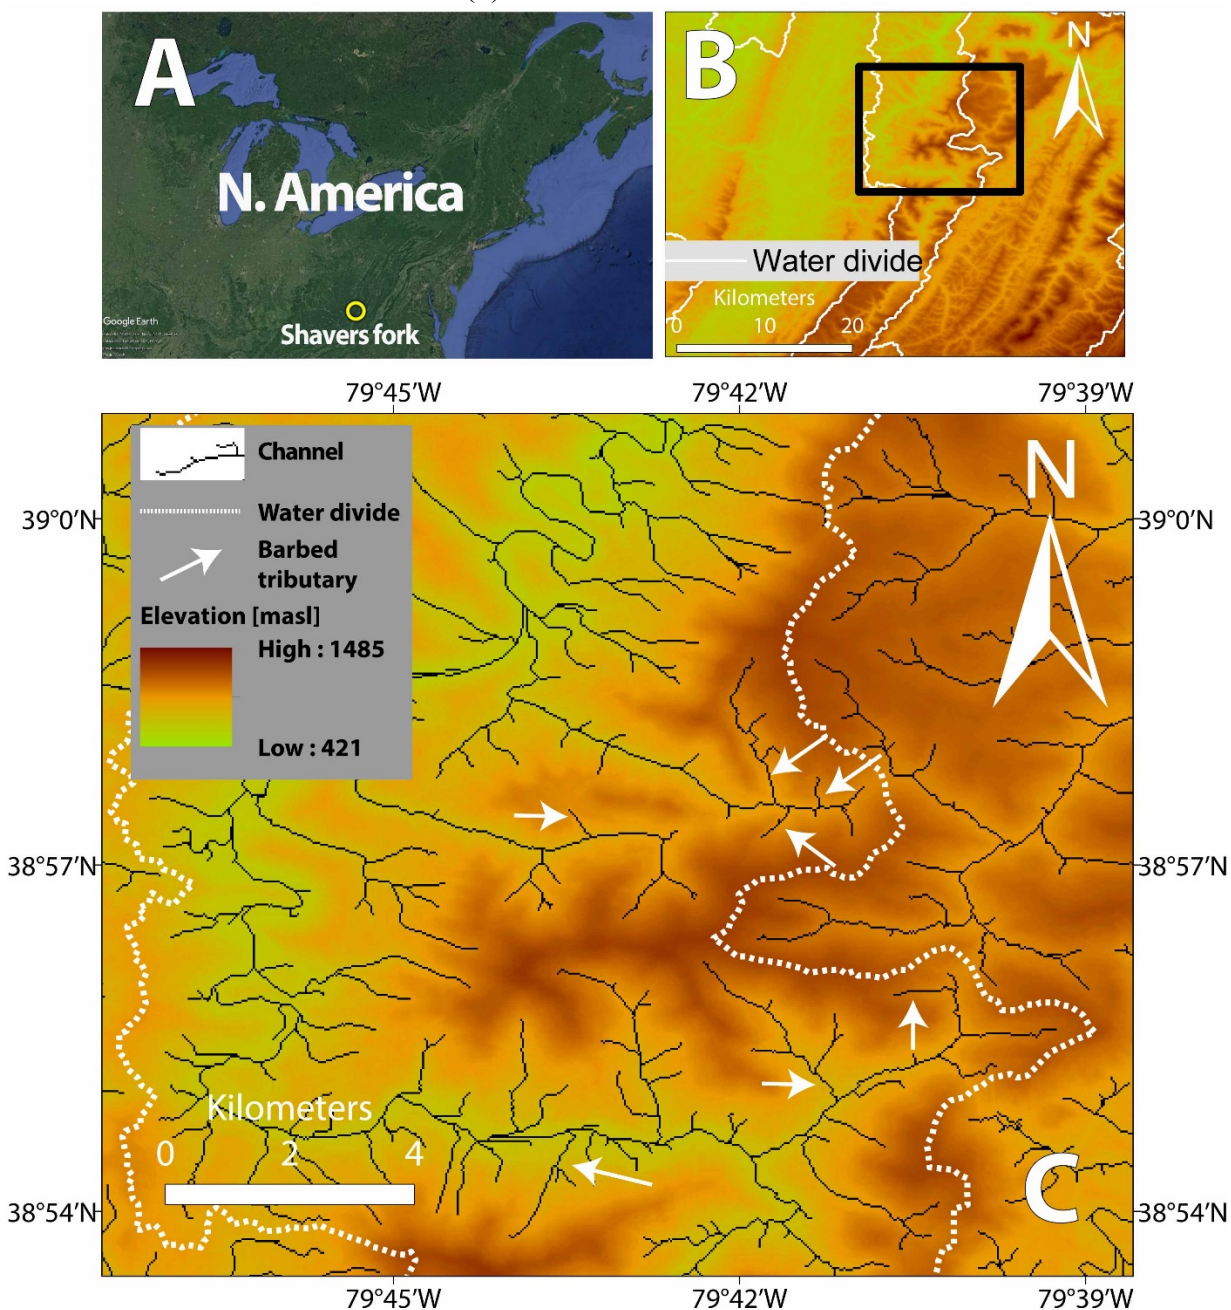

Figure DR4. Barbed drainages in the Shavers fork, near an erosional escarpment in West Virginia. A. General Location map. B. Zoom-in location map. The highland is incised by large channels that drain northward. C. Reversed channels with barbed tributaries drain the highland across the escarpment. Note that in this example, reversal occurs toward an erosional escarpment, which is not part of the Appalachian continental divide.

(8) FIGURE DR5.

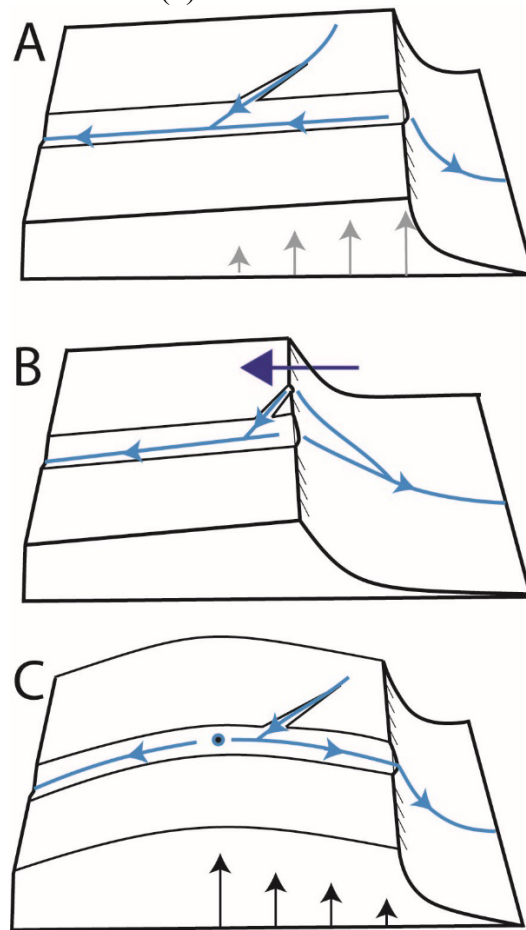

Figure DR5. A cartoon showing the expected effect of tectonic tilting and cliff retreat on diverging channels across a cliff. A. Tilting away from the cliff, depicted by the gray arrows, is predicted by geodynamic models for great escarpments (Gilchrist and Summerfield, 1990; King and Ellis, 1990). Such tilting hinders reversal towards the cliff. B. Simultaneous cliff and divide retreat (blue arrow) erases the antecedent drainage pattern and cannot produce reversed drainages. C. Tectonic tilt toward the cliff (black arrows) could induce flow reversal toward the cliff (Bishop, 1995), but a general source for such a tilt is not recognized.



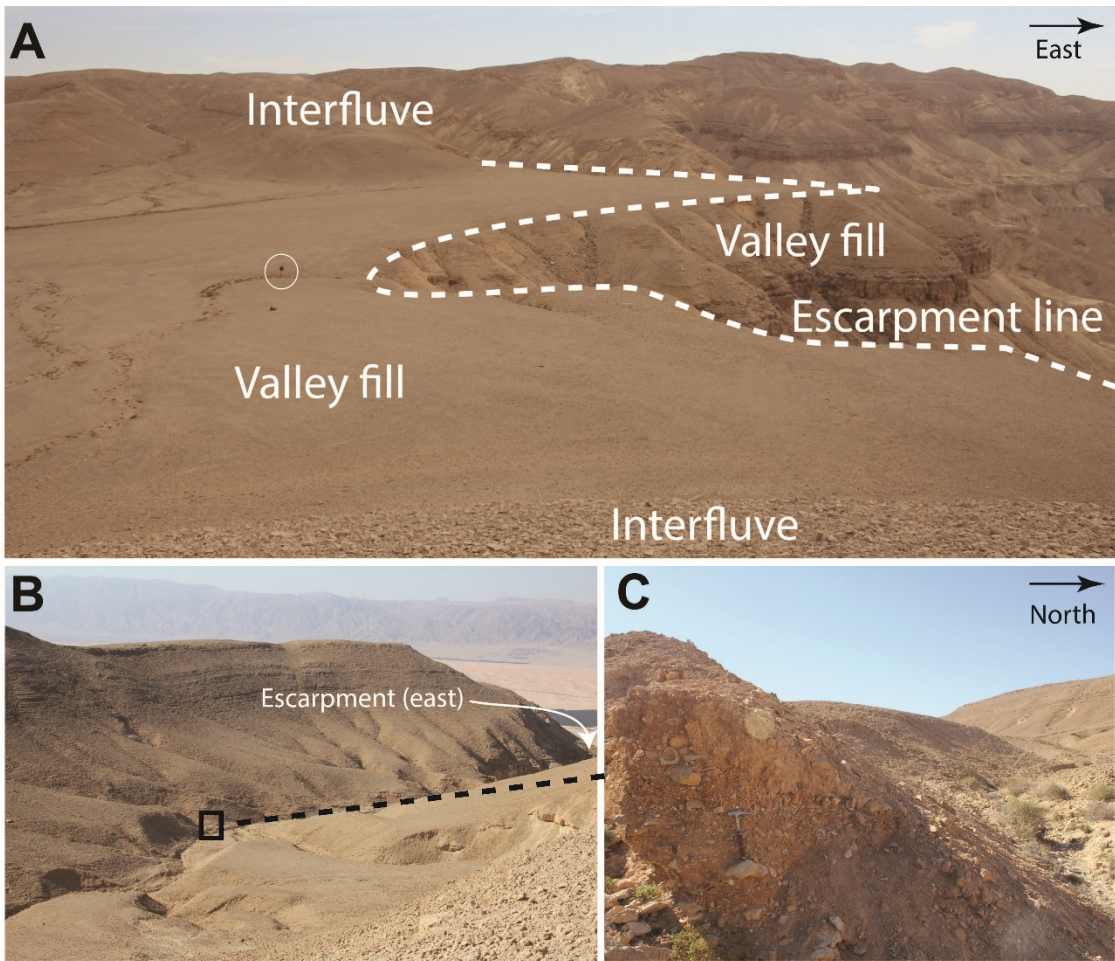

218 Figure DR6: Field photos showing two stages in the evolution of reversed channels that  
219 flow toward the escarpment. A. View of a wide truncated valley full of sediments (the  
220 white circle marks a person's figure for scale), that formed by escarpment retreat. A short  
221 reversed channel (no. 36 in the supplementary DR1 table) incises in the erodible fill  
222 toward the Arava Valley. B. View of Itró east valley (no. 10 in the supplementary DR1  
223 table), that incises into erodible terraces that cover the channel bed. Note the contrast  
224 between the hard limestone that caps the interfluvies and the more erodible colluvial-  
225 alluvial deposits that fill the valley. C. Close-up on a sediment fill outcrop within a  
226 terrace in Itró east valley, showing alternating silts and angular small gravel, mixed with  
227 colluvial large boulders of up to few tens of cm. Hammer for scale.



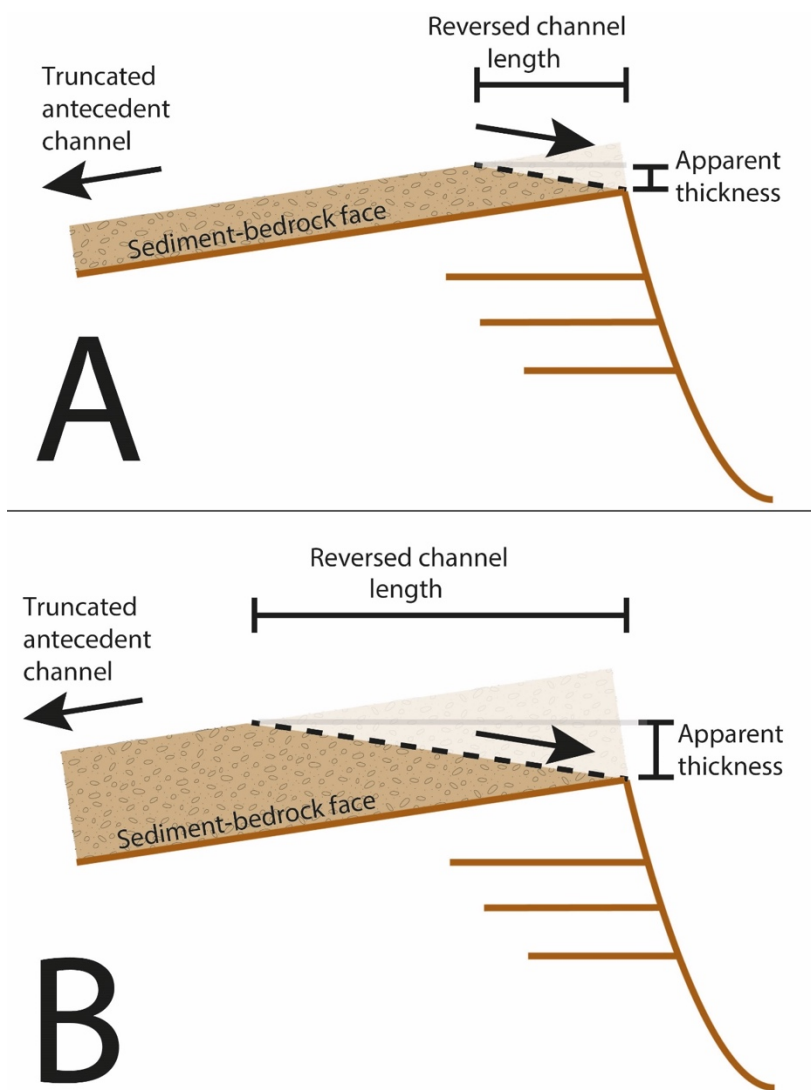

231 Figure DR7: A conceptual cartoon showing the expected correlation between the  
232 thickness of the erodible fill and the length of the reversed channel segments. The source  
233 of the fill can be fluvial, from the antecedent channel, or colluvial from the adjacent  
234 hillslopes. The dashed lines represent the course of the reversed segments that incise into  
235 the erodible fill, and the transparent grey line is the water divide elevation. The profile of  
236 the reversed channels can vary from immature convex to mature concave. Here, for  
237 simplicity, it is depicted by a straight dashed line, whose slope is similar in magnitude  
238 and opposite in direction to the antecedent channel slope, producing transiently stable  
239 divide. A and B for thin and thick erodible fills that produce short and long reversed  
240 segments, respectively.

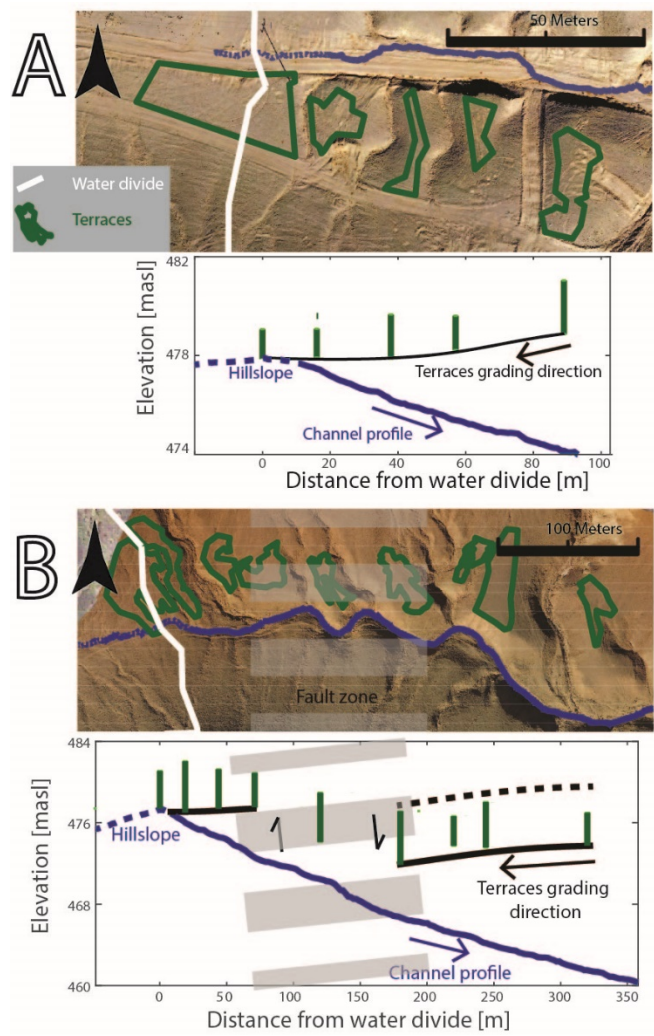

243 Fig. DR8. Drone acquired aerial photos of reversed channels showing east flowing  
244 channels incised into west grading terraces. In each site, the terraces, the channel route  
245 and the divide are shown over the aerial photo (top). The longitudinal profile and the  
246 projection of the terraces are shown at the bottom. The green bars indicate the maximum  
247 and minimum elevation of each terrace and the black curves show an interpreted surface  
248 that grades to the west. A. Upper Shahrut East Basin (see methods DR1). B. An upper  
249 reach of Itrou East Basin. Here, we mapped a steep fault and propose that it offsets the east  
250 group of terraces downward by 5-6 meters with respect to the west terraces. The dashed  
251 black line shows the reconstructed elevation of the lower extent of the east terraces prior  
252 to faulting.

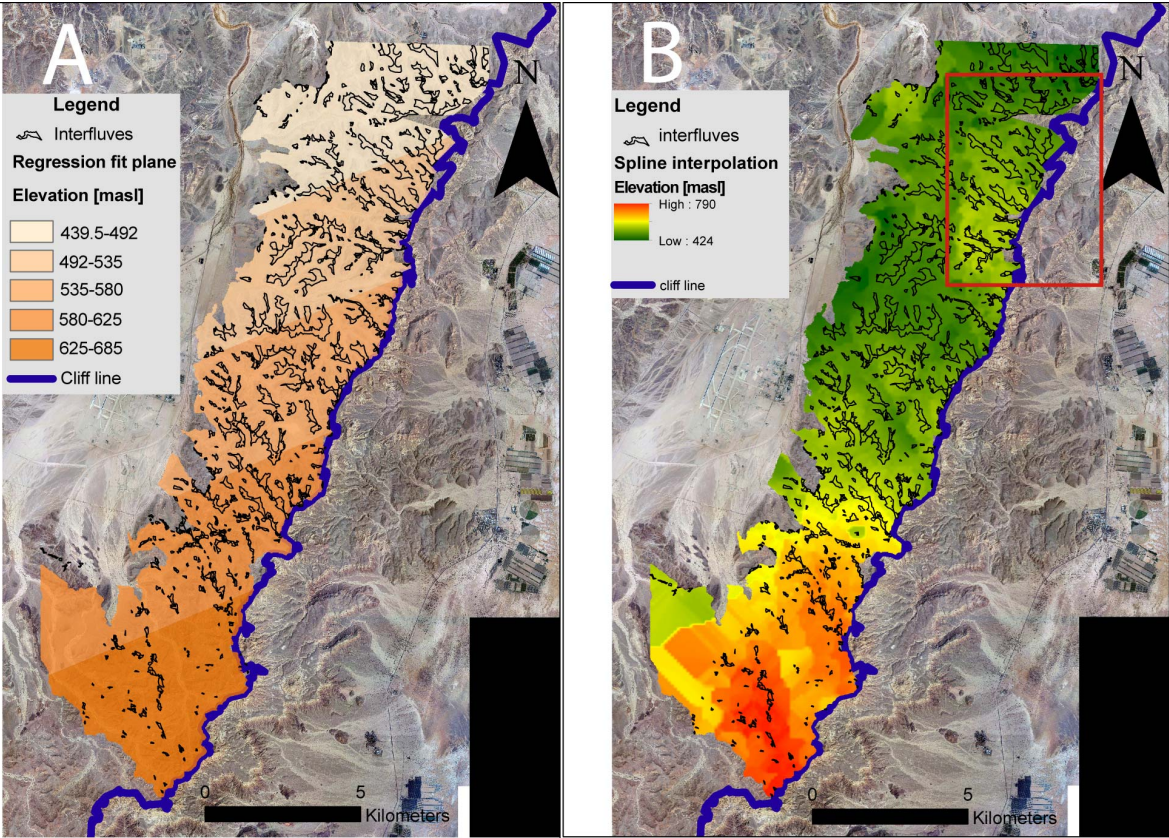

Figure DR9. A. Linear regression plane based on the elevation of the flat interfluves (small black polygons) in the study area. The interfluves were extracted automatically by identifying low relief surfaces far from channels and were validated by visual inspection. The surface shows highland grading to the northwest, which is not expected to contribute to eastward flow reversal. The blue line marks the escarpment edge, separating the southeastern Negev highland at the west from the Arava Valley at the east. B. Spline interpolation surface, based on the elevation of the flat interfluves in the study area. Note that although the spline surface generally grades to the northwest, small regions along the north part close to the cliff edge (in the red rectangle) show local gradient to the north or northeast.

- 267 Amit, R., Zilberman, E., Enzel, Y., and Porat, N., 2002, Paleoseismic evidence for time  
268 dependency of seismic response on a fault system in the southern Arava Valley,  
269 Dead Sea rift, Israel: GSA Bulletin, v. 114, p. 192–206,  
270 [http://dx.doi.org/10.1130/0016-7606\(2002\)114%3C0192:PEFTDO%3E2.0.CO](http://dx.doi.org/10.1130/0016-7606(2002)114%3C0192:PEFTDO%3E2.0.CO).
- 271 Avni, Y., Bartov, Y., Garfunkel, Z., and Ginat, H., 2000, Evolution of the Paran drainage  
272 basin and its relation to the Plio-Pleistocene history of the Arava Rift western  
273 margin, Israel.: Israel Journal of Earth Sciences, v. 49, p. 215–238, doi:  
274 10.1560/W8WL-JU3Y-KM7W-8LX4.
- 275 Avni, Y., Segev, A., and Ginat, H., 2012, Oligocene regional denudation of the northern  
276 Afar dome: Pre- and syn-breakup stages of the Afro-Arabian plate: Bulletin of the  
277 Geological Society of America, v. 124, p. 1871–1897, doi: 10.1130/B30634.1.
- 278 Beyth, M., Sagy, A., Hajazi, H., Alkhraisha, S., Mushkin, A., and Ginat, H., 2018, New  
279 evidence on the accurate displacement along the Arava/Araba segment of the Dead  
280 Sea Transform: International Journal of Earth Sciences, v. 107, p. 1431–1443, doi:  
281 10.1007/s00531-017-1549-7.
- 282 Bishop, P., 1995, Drainage rearrangement by river capture, beheading and diversion:  
283 Progress in Physical Geography, v. 19, p. 449–473, doi:  
284 10.1177/030913339501900402.
- 285 Garfunkel, Z., Ben-Avraham, Z., and Kagen, E., 2014, Dead Sea Transform Fault  
286 System : Reviews: 183–205 p., doi: 10.1007/978-94-017-8872-4\_7.
- 287 Gilchrist, A.R., and Summerfield, M.A., 1990, Differential denudation and flexural  
288 isostasy in formation of rifted-margin upwarps: Nature, v. 346, p. 739,

289        <http://dx.doi.org/10.1038/346739a0>.

290    Ginat, H., Enzel, Y., and Avni, Y., 1998, Translocated Plio-Pleistocene drainage systems  
291        along the Arava fault of the Dead Sea transform: *Tectonophysics*, v. 284, p. 151–  
292        160, doi: 10.1016/S0040-1951(97)00165-0.

293    Ginat, H., Zilberman, E., and Avni, Y., 2000, Tectonic and paleogeographic significance  
294        of the Edom River , a Pliocene stream that crossed the Dead Sea Rift valley: *Israel*  
295        *Journal of Earth Sciences*, v. 49, p. 159–177, doi: 10.1560/N2P9-YBJ0-Q44Y-  
296        GWYN.

297    Guralnik, B., Matmon, A., Avni, Y., and Fink, D., 2010, 10Be exposure ages of ancient  
298        desert pavements reveal Quaternary evolution of the Dead Sea drainage basin and  
299        rift margin tilting: *Earth and Planetary Science Letters*, v. 290, p. 132–141, doi:  
300        10.1016/j.epsl.2009.12.012.

301    King, G., and Ellis, M., 1990, The origin of large local uplift in extensional regions:  
302        *Nature*, v. 348, p. 689, <http://dx.doi.org/10.1038/348689a0>.

303    Mart, Y., and Vachtman, D., 2015, The internal grabens of the Levant Rifts and their  
304        geodynamic significance: *Comptes Rendus Geoscience*, v. 347, p. 191–200, doi:  
305        10.1016/j.crte.2015.06.010.

306    Matmon, A., Bierman, P., and Enzel, Y., 2002, Pattern and tempo of great escarpment  
307        erosion: *Geology*, v. 30, p. 1135–1138, [http://dx.doi.org/10.1130/0091-](http://dx.doi.org/10.1130/0091-7613(2002)030%3C1135:PATOGE%3E2.0.CO)  
308        7613(2002)030%3C1135:PATOGE%3E2.0.CO.

309    Ollier, C.D., 1995, Tectonics and landscape evolution in southeast Australia:  
310        *Geomorphology*, v. 12, p. 37–44, doi: [https://doi.org/10.1016/0169-555X\(94\)00075-](https://doi.org/10.1016/0169-555X(94)00075-3)  
311        3.

312 Ollier, C.D., and Pain, C.F., 1997, Equating the basal unconformity with the palaeoplain:  
 313 a model for passive margins: *Geomorphology*, v. 19, p. 1–15, doi:  
 314 [https://doi.org/10.1016/S0169-555X\(96\)00048-7](https://doi.org/10.1016/S0169-555X(96)00048-7).  
 315 Perron, J.T., and Royden, L., 2012, An integral approach to bedrock river profile  
 316 analysis: *Earth Surface Processes and Landforms*, v. 38, p. 570–576.  
 317 Seidl, M.A., Weissel, J.K., and Pratson, L.F., 1996, The kinematics and pattern of  
 318 escarpment retreat across the rifted continental margin of SE Australia: *Basin*  
 319 *Research*, v. 8, p. 301–316.  
 320 Vaks, A., Woodhead, J., Bar-Matthews, M., Ayalon, A., Cliff, R.A., Zilberman, T.,  
 321 Matthews, A., and Frumkin, A., 2013, Pliocene–Pleistocene climate of the northern  
 322 margin of Saharan–Arabian Desert recorded in speleothems from the Negev Desert,  
 323 Israel: *Earth and Planetary Science Letters*, v. 368, p. 88–100, doi:  
 324 <https://doi.org/10.1016/j.epsl.2013.02.027>.  
 325 Wdowinski, S., and Zilberman, E., 1996, Kinematic modelling of large-scale structural  
 326 asymmetry across the Dead Sea Rift: *Tectonophysics*, v. 266, p. 187–201, doi:  
 327 [10.1016/s0040-1951\(96\)00238-7](https://doi.org/10.1016/s0040-1951(96)00238-7).  
 328 Wdowinski, S., and Zilberman, E., 1997, Systematic analyses of the large-scale  
 329 topography and structure across the Dead Sea Rift: *Tectonics*, v. 16, p. 409–424,  
 330 doi: [10.1029/97TC00814](https://doi.org/10.1029/97TC00814).  
 331 Wessel, B., 2016, TanDEM-X Ground Segment – DEM Products Specification  
 332 Document: EOC, DLR, Oberpfaffenhofen, Germany, Public Document TD-GS-PS-  
 333 0021, Issue 3.1, <https://tandemx-science.dlr.de/>.  
 334 Willett, S.D., McCoy, S.W., Perron, J.T., Goren, L., and Chen, C.-Y., 2014, Dynamic

335 reorganization of river basins: Science, v. 343, p. 1248765.

336
